# Supplementary material for: Cross-coupling reactions of aryl and vinyl chlorides catalyzed by a palladium complex derived from an air-stable H-phosphonate
Source: Royal Society of Chemistry journal article supplement (doi:10.1039/b518283b), 2006-01-01
Supplement: b518283b.pdf [file b518283b.pdf]

## Supporting Information

### Cross-coupling reactions of aryl and vinyl chlorides catalyzed by a palladium complex derived from an air- stable *H*-phosphonate

Lutz Ackermann,\* Christian J. Gschrei, Andreas Althammer and  
Melanie Riederer

Lutz.Ackermann@cup.uni-muenchen.de

#### *General remarks:*

Catalytic reactions were carried out on a 1 mmol scale under a N<sub>2</sub> atmosphere using pre-dried glassware. Chemicals were obtained from commercial sources, and were used without further purification. Dioxane was dried over sodium and freshly distilled under N<sub>2</sub>. Yields refer to isolated compounds, estimated to be > 95 % pure as determined by <sup>1</sup>H-NMR and GC analysis. Flash chromatography: Merck silica gel 60 (230-400 mesh). NMR: Spectra were recorded on a Bruker ARX 300 instrument in the solvent indicated; chemical shifts (δ) are given in ppm.

**Representative procedure for palladium-catalyzed cross-coupling reactions of aryl chlorides with organosilicium-reagents (Table 2, entry 4):**

A solution of [Pd(dba)<sub>2</sub>] (29 mg, 0.05 mmol, 5 mol%) and **8** (51 mg, 0.10 mmol, 10 mol%), 4-chloronitrobenzene (0.158 g, 1.00 mmol), phenyltrimethoxysilane (**2a**) (0.397 g, 2.00 mmol) and TBAF × 3 H<sub>2</sub>O (0.631 g, 2.00 mmol) in dry dioxane (2 mL) was stirred for 17 h at 80 °C. Et<sub>2</sub>O (50 mL) and H<sub>2</sub>O (50 mL) were added to the reaction mixture. The separated aqueous phase was extracted with Et<sub>2</sub>O (2 × 50 mL). The combined organic layers were dried over MgSO<sub>4</sub> and concentrated in vacuo. The remaining residue was purified by column chromatography on silica gel (*n*-pentane/Et<sub>2</sub>O = 50/1→30/1) to yield **3d** (0.157 g, 79 %) as a light yellow solid (MP: 114.0–114.2 °C). The spectral data were in accordance with those reported in the literature.<sup>[1]</sup>

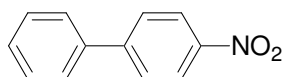

<sup>1</sup>H-NMR (300 MHz, CDCl<sub>3</sub>): δ = 8.30 (md, *J* = 9.0 Hz, 2H), 7.74 (md, *J* = 8.8 Hz, 2H), 7.63 (md, *J* = 8.3 Hz, 2H), 7.53–7.43 (m, 3H). <sup>13</sup>C-NMR (75 MHz, CDCl<sub>3</sub>): δ = 147.6, 147.1, 138.7, 129.1, 128.9, 127.7, 127.3, 124.1. IR (KBr): 2961, 1593, 1575, 1509, 1477, 1448, 1337, 1101, 851, 773, 737 cm<sup>-1</sup>. MS (EI) *m/z* (relative intensity) 200 (11), 199 ([M<sup>+</sup>] 100), 169 (24), 153 (29), 152 (79), 151 (18), 150 (5), 141 (15), 127 (6), 126 (5),

115 (6), 77 (4), 76 (8), 75 (4), 63 (4). HR-MS (EI)  $m/z$  calcd for  $C_{12}H_9NO_2$  199.0633, found 199.0619.

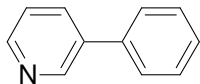

**3-Phenylpyridine (3a) (Table 2, entry 1):** The representative procedure was followed, using 3-chloropyridine (**1a**) (0.113 g, 1.00 mmol) and phenyltrimethoxysilane (**2a**) (0.397 g, 2.00 mmol). After 17 h, purification by chromatography (*n*-pentane/Et<sub>2</sub>O = 5/1→2/1→1/1) yielded **3a** (0.098 g, 63 %) as a yellow liquid. The spectral data were in accordance with those reported in the literature.<sup>[2]</sup>

<sup>1</sup>H-NMR (300 MHz, CDCl<sub>3</sub>):  $\delta$  = 8.85 (dd,  $J$  = 2.3, 0.8 Hz, 1H), 8.58 (dd,  $J$  = 4.9, 1.7 Hz, 1H), 7.86 (ddd,  $J$  = 7.8, 2.3, 1.7 Hz, 1H), 7.59–7.55 (m, 2H), 7.51–7.32 (m, 4H). <sup>13</sup>C-NMR (75 MHz, CDCl<sub>3</sub>):  $\delta$  = 148.4, 148.2, 137.8, 136.6, 134.3, 129.0, 128.0, 127.1, 123.5. IR (KBr): 3400, 3055, 1528, 1473, 1450, 1407, 1277, 1076, 1024, 1006, 913 cm<sup>-1</sup>. MS (EI)  $m/z$  (relative intensity) 155 ([M<sup>+</sup>] 100), 127 (7), 102 (5), 77 (3). HR-MS (EI)  $m/z$  calcd for C<sub>11</sub>H<sub>9</sub>N 155.0735, found 155.0739.

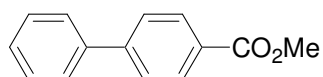

**Biphenyl-4-carboxylic acid methyl ester (3b) (Table 2, entry 2):** The representative procedure was followed, using 4-chlorobenzoic acid methyl ester (**1b**) (0.170 g, 1.00 mmol), phenyltrimethoxysilane (**2a**) (0.397 g, 2.00 mmol). After 17 h, purification by chromatography (*n*-pentane/Et<sub>2</sub>O = 50/1) yielded **3b** (0.145 g, 68 %) as a colourless solid (MP: 117.0–117.3 °C). The spectral data were in accordance with those reported in the literature.<sup>[3]</sup>

<sup>1</sup>H-NMR (300 MHz, CDCl<sub>3</sub>): δ = 8.12 (md, *J* = 8.6 Hz, 2H), 7.68–7.61 (m, 4H), 7.50–7.37 (m, 3H), 3.95 (s, 3H). <sup>13</sup>C-NMR (75 MHz, CDCl<sub>3</sub>): δ = 193.7, 167.0, 145.6, 140.0, 130.1, 128.9, 128.1, 127.2, 127.0, 52.1. IR (KBr): 2945, 1708, 1605, 1436, 1403, 1286, 1267, 1207, 1111, 856, 748, 699 cm<sup>-1</sup>. MS (EI) *m/z* (relative intensity) 212 ([M<sup>+</sup>] 67), 182 (12), 181 (100), 153 (24), 152 (37), 127 (4), 126 (3), 102 (2), 76 (13), 63 (2). HR-MS (EI) *m/z* calcd for C<sub>14</sub>H<sub>12</sub>O<sub>2</sub> 212.0837, found 212.0816.

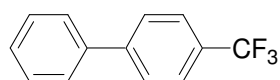

**1-Phenyl-4-trifluoromethylbenzene (3c) (Table 2, entry 3):** The representative procedure was followed, using 4-chloro-(trifluoromethyl)benzene (**1c**) (0.181 g, 1.00 mmol) and phenyltrimethoxysilane (**2a**) (0.397 g, 2.00 mmol). After

17 h, purification by chromatography (*n*-pentane/Et<sub>2</sub>O = 50/1) yielded **3c** (0.138 g, 62 %) as a colourless solid (MP: 69.0–69.3 °C). The spectral data were in accordance with those reported in the literature.<sup>[1]</sup>

<sup>1</sup>H-NMR (300 MHz, CDCl<sub>3</sub>): δ = 7.71–7.70 (m, 4H), 7.63–7.59 (m, 2H), 7.52–7.41 (m, 3H). <sup>13</sup>C-NMR (75 MHz, CDCl<sub>3</sub>): δ = 144.7, 139.8, 129.0, 128.9, 128.2, 127.4, 127.3, 125.7, 124.3. <sup>19</sup>F-NMR (375 MHz, CDCl<sub>3</sub>): δ = -60.7 (s). IR (KBr): 3083, 3037, 2929, 2854, 1326, 1111, 1072, 1014, 1005, 842, 765, 726 cm<sup>-1</sup>. MS (EI) *m/z* (relative intensity) 222 ([M<sup>+</sup>] 100), 221 (2), 203 (6), 201 (6), 172 (2), 153 (9), 152 (11), 151 (3), 111 (2), 86 (3), 76 (2). HR-MS (EI) *m/z* calcd for C<sub>13</sub>H<sub>9</sub>F<sub>3</sub> 222.0656, found 222.0670.

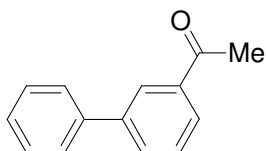

**3-Acetylbiphenyl (3e) (Table 2, entry 5):** The representative procedure was followed, using 3-chloroacetophenone (**1e**) (0.155 g, 1.00 mmol) and phenyltrimethoxysilane (**2a**) (0.397 g, 2.00 mmol). After 17 h, purification by chromatography (*n*-pentane/Et<sub>2</sub>O = 50/1→25/1→5/1) yielded **3e** (0.139 g, 71 %) as a colourless solid (MP: 121.7–122.3 °C). The spectral data were in accordance with those reported in the literature.<sup>[2]</sup>

<sup>1</sup>H-NMR (300 MHz, CDCl<sub>3</sub>): δ = 8.04 (md, *J* = 8.6 Hz, 2H), 7.69 (md, *J* = 8.6 Hz, 2H), 7.65–7.61 (m, 2H), 7.51–7.37 (m, 3H), 2.64 (s, 3H). <sup>13</sup>C-NMR (75 MHz, CDCl<sub>3</sub>): δ = 197.7, 145.7, 139.8,

135.8, 128.9, 128.9, 128.2, 127.2, 127.2, 26.6. IR (KBr): 3033, 2997, 1676, 1599, 1403, 1357, 1261, 841, 831, 762, 719, 689  $\text{cm}^{-1}$ . MS (EI)  $m/z$  (relative intensity) 196 ( $[\text{M}^+]$  43), 182 (14), 181 (100), 154 (5), 153 (32), 152 (39), 151 (10), 127 (4), 126 (4), 76 (11). HR-MS (EI)  $m/z$  calcd for  $\text{C}_{14}\text{H}_{12}\text{O}$  196.0888, found 196.0863.

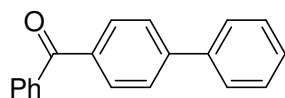

**4-Phenylbenzophenone (3f) (Table 2, entry 6):** The representative procedure was followed, using 4-chlorobenzophenone (**1f**) (0.217 g, 1.00 mmol) and phenyltrimethoxysilane (**2a**) (0.397 g, 2.00 mmol). After 17 h, purification by chromatography ( $n$ -pentane/ $\text{Et}_2\text{O}$  = 100/1) yielded **3f** (0.167 g, 65 %) as a colourless solid (MP: 103.2–106.2  $^\circ\text{C}$ ). The spectral data were in accordance with those reported in the literature.<sup>[4]</sup>

$^1\text{H-NMR}$  (300 MHz,  $\text{CDCl}_3$ ):  $\delta$  = 7.91 (md,  $J$  = 8.6 Hz, 2H), 7.85 (md,  $J$  = 8.4 Hz, 2H), 7.71 (md,  $J$  = 8.6 Hz, 2H), 7.66 (md,  $J$  = 8.1 Hz, 2H), 7.62–7.57 (m, 1H), 7.55–7.45 (m, 4H), 7.45–7.37 (m, 1H).  $^{13}\text{C-NMR}$  (75 MHz,  $\text{CDCl}_3$ ):  $\delta$  = 193.7, 145.2, 139.9, 137.7, 136.2, 132.3, 130.7, 129.9, 128.9, 128.3, 128.1, 127.2, 126.9. IR (KBr): 3052, 2037, 1644, 1602, 1578, 1401, 1318, 1291, 1275, 1150, 1005, 940, 852  $\text{cm}^{-1}$ . MS (EI)  $m/z$  (relative intensity) 259 (16), 258 ( $[\text{M}^+]$  73), 181 (100), 152 (30), 105

(20), 77 (14). HR-MS (EI)  $m/z$  calcd for  $C_{19}H_{14}O$  258.1045 , found 258.1056.

**Representative procedure for palladium-catalyzed cross-coupling reactions of aryl chlorides with organotin-reagents (Table 2, entry 8):**

A solution of  $[Pd(dba)_2]$  (29 mg, 0.05 mmol, 5 mol%) and **8** (51 mg, 0.10 mmol, 10 mol%), 4-chloronitrobenzene (**1d**) (0.158 g, 1.00 mmol), phenyltrimethoxytin (0.404 g, 1.10 mmol) and TBAF  $\times$  3  $H_2O$  (0.631 g, 2.00 mmol) in dry dioxane (2 mL) was stirred for 24 h at 80 °C.  $Et_2O$  (50 mL) and  $H_2O$  (50 mL) were added to the reaction mixture. The separated aqueous phase was extracted with  $Et_2O$  (2  $\times$  50 mL). The combined organic layers were dried over  $MgSO_4$  and concentrated in vacuo. The remaining residue was purified by column chromatography on silica gel ( $n$ -pentane/ $Et_2O$  = 50/1) to yield **3d** (0.107 g, 54 %) as a light yellow solid (MP: 112.8–113.2 °C). The spectral data were in accordance with those reported in the literature.<sup>[1]</sup>

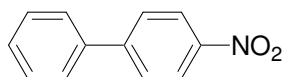

$^1H$ -NMR (300 MHz,  $CDCl_3$ ):  $\delta$  = 8.30 (md,  $J$  = 9.0 Hz, 2H), 7.74 (md,  $J$  = 8.8 Hz, 2H), 7.63 (md,  $J$  = 8.3 Hz, 2H), 7.53–7.43 (m, 3H).  $^{13}C$ -NMR (75 MHz,  $CDCl_3$ ):  $\delta$  = 147.6, 147.1, 138.7, 129.1, 128.9, 127.7, 127.3, 124.1. IR (KBr): 2961, 1593, 1575, 1509, 1477, 1448, 1337, 1101, 851, 773, 737  $cm^{-1}$ . MS (EI)  $m/z$

(relative intensity) 200 (11), 199 ( $[M^+]$  100), 169 (24), 153 (29), 152 (79), 151 (18), 150 (5), 141 (15), 127 (6), 126 (5), 115 (6), 77 (4), 76 (8), 75 (4), 63 (4). HR-MS (EI)  $m/z$  calcd for  $C_{12}H_9NO_2$  199.0633, found 199.0619.

### Representative procedure for palladium-catalyzed cross-coupling reactions of aryl chlorides with Grignard-reagents

#### 4-Methoxy-3'-methylbiphenyl (**3h**) (Table 2, entry 9):

A solution of  $[Pd(OAc)_2]$  (5 mg, 0.02 mmol, 2 mol%) and **8** (21 mg, 0.04 mmol, 4 mol%) in THF (2 mL) was stirred at rt for 5 min. Thereafter, 4-methoxyphenylmagnesiumbromide (1.50 mL, 1.50 mmol) was added dropwise. The resulting dark solution was stirred for 5 min at ambient temperature and 3-chlorotoluene (**1h**) (0.127 g, 1.00 mmol) was added. Subsequently, the resulting solution was stirred for 23 h at 60 °C.  $Et_2O$  (50 mL) and  $H_2O$  (50 mL) were added to the reaction mixture. The separated aqueous phase was extracted with  $Et_2O$  (2 × 50 mL). The combined organic layers were dried over  $MgSO_4$  and concentrated in vacuo. The remaining residue was purified by column chromatography on silica gel ( $n$ -pentane/ $Et_2O$  = 5/1→2/1) to yield **3h** (0.144 g, 73 %) as a colourless solid (MP: 48.1–49.5 °C). The spectral data were in accordance with those reported in the literature.<sup>[5]</sup>

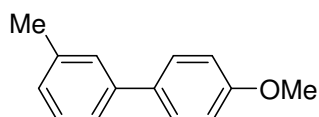



$^1\text{H-NMR}$  (300 MHz,  $\text{CDCl}_3$ ):  $\delta$  = 7.55 (md,  $J$  = 8.8 Hz, 2H), 7.34–7.29 (m, 3H), 7.15 (d,  $J$  = 7.1 Hz, 1H), 7.01 (md,  $J$  = 8.8 Hz, 2H), 3.86 (s, 3H), 2.42 (s, 3H).  $^{13}\text{C-NMR}$  (75 MHz,  $\text{CDCl}_3$ ):  $\delta$  = 159.1, 140.8, 138.3, 133.9, 129.4, 128.6, 128.1, 127.5, 123.8, 114.1, 55.3, 41.7. IR (KBr): 3033, 2956, 1607, 1517, 1486, 1252, 1030, 838, 787  $\text{cm}^{-1}$ . MS (EI)  $m/z$  (relative intensity) 198 ( $[\text{M}^+]$  100), 183 (42), 155 (22), 115 (4), 77 (1). HR-MS (EI)  $m/z$  calcd for  $\text{C}_{14}\text{H}_{14}\text{O}$  198.1045, found 198.1044.

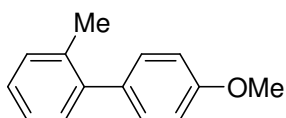

**4-Methoxy-2`-methylbiphenyl (3i) (Table 2, entry 10):** The representative procedure was followed, using 4-methoxyphenylmagnesiumbromide (1.50 mL, 1.50 mmol) and 2-chlorotoluene (**1i**) (0.128 g, 1.02 mmol). After 21 h, purification by chromatography ( $n$ -pentane/ $\text{Et}_2\text{O}$  = 100/1) yielded **3i** (0.122 g, 61 %) as a colourless solid (MP: 51.3–52.2  $^\circ\text{C}$ ). The spectral data were in accordance with those reported in the literature.<sup>[6]</sup>

$^1\text{H-NMR}$  (300 MHz,  $\text{CDCl}_3$ ):  $\delta$  = 7.25–7.20 (m, 6H), 6.98–6.92 (md,  $J$  = 8.8 Hz, 2H), 3.85 (s, 3H), 2.27 (s, 3H).  $^{13}\text{C-NMR}$  (75 MHz,  $\text{CDCl}_3$ ):  $\delta$  = 158.5, 141.5, 135.5, 134.4, 130.3, 130.2, 129.9, 126.9, 125.7, 113.5, 55.3, 20.5. IR (KBr): 3060, 2954, 1613, 1516, 1484, 1244, 1177, 1039, 834, 762  $\text{cm}^{-1}$ . MS (EI)  $m/z$

(relative intensity) 198 ( $[M^+]$  100), 183 (19), 155 (17), 128 (8), 55 (4). HR-MS (EI)  $m/z$  calcd for  $C_{14}H_{14}O$  198.1045, found 198.1028.

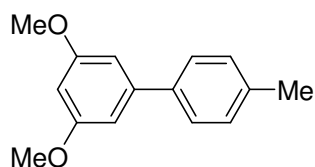

**3,5-Dimethoxy-4'-methylbiphenyl (3j) (Table 2, entry 11):** The representative procedure was followed, using 4-methylphenylmagnesiumbromide (1.50 mL, 1.50 mmol) and 5-chloro-1,3-dimethoxybenzene (**1j**) (0.172 g, 1.00 mmol). After 20 h, purification by chromatography (*n*-pentane/Et<sub>2</sub>O = 200/1→50/1) yielded **3j** (0.197 g, 86 %) as a colourless liquid. The spectral data were in accordance with those reported in the literature.<sup>[7]</sup>

<sup>1</sup>H-NMR (300 MHz, CDCl<sub>3</sub>):  $\delta$  = 7.50 (d,  $J$  = 8.1 Hz, 2H), 7.25 (d,  $J$  = 8.0 Hz, 2H), 6.75 (d,  $J$  = 2.2 Hz, 2H), 6.48 (t,  $J$  = 2.2 Hz, 1H), 3.86 (s, 6H), 2.41 (s, 3H). <sup>13</sup>C-NMR (75 MHz, CDCl<sub>3</sub>):  $\delta$  = 161.0, 143.4, 138.3, 137.3, 129.4, 127.0, 105.3, 99.0, 55.4, 21.1. IR (KBr): 2997, 2836, 1591, 1568, 1454, 1312, 1202, 1150, 1063, 992, 807 cm<sup>-1</sup>. MS (EI)  $m/z$  (relative intensity) 228 ( $[M^+]$  100), 199 (17), 184 (8), 141 (6), 115 (2). HR-MS (EI)  $m/z$  calcd for  $C_{15}H_{16}O_2$  228.1150, found 228.1150.

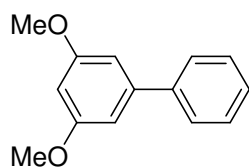

**3,5-Dimethoxybiphenyl (3k) (Table 2, entry 12):** The representative procedure was followed, using phenylmagnesiumchloride (0.90 mL, 1.50 mmol) and 5-chloro-1,3-dimethoxybenzene (**1j**) (0.173 g, 1.00 mmol). After 18 h, purification by chromatography (*n*-pentane/Et<sub>2</sub>O = 200/1→100/1) yielded **3k** (0.204 g, 95 %) as a colourless liquid. The spectral data were in accordance with those reported in the literature.<sup>[8]</sup>

<sup>1</sup>H-NMR (300 MHz, CDCl<sub>3</sub>): δ = 7.58–7.62 (m, 5H), 7.34–7.47 (m, 2H), 6.76 (m, 1H), 3.86 (s, 6H). <sup>13</sup>C-NMR (75 MHz, CDCl<sub>3</sub>): δ = 161.0, 143.5, 141.2, 128.7, 127.5, 127.2, 105.5, 99.3, 55.4. IR (KBr): 3059, 2937, 2837, 1591, 1574, 1499, 1415, 1334, 1202, 1150, 1063, 914 cm<sup>-1</sup>. MS (EI) *m/z* (relative intensity) 214 ([M<sup>+</sup>] 100), 185 (21), 170 (8), 155 (4), 141 (8), 128 (13), 115 (5). HR-MS (EI) *m/z* calcd for C<sub>14</sub>H<sub>14</sub>O<sub>2</sub> 214.0994, found 214.0973.

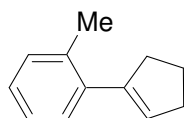

**1-Cyclopentenyl-2-methylbenzene (3l) (Table 2, entry 13):** The representative procedure was followed, using 2-methylphenylmagnesiumbromide (1.50 mL, 1.50 mmol) and

1-chlorocyclopentene (**11**) (0.102 g, 1.00 mmol). After 18 h, purification by chromatography (*n*-pentane) yielded **31** (0.135 g, 85 %) as a colourless liquid. The spectral data were in accordance with those reported in the literature.<sup>[9]</sup>

<sup>1</sup>H-NMR (300 MHz, CDCl<sub>3</sub>): δ = 7.20–7.10 (m, 4H), 5.75 (m, 1H), 2.70–2.60 (m, 2H), 2.56–2.45 (m, 2H), 2.35 (s, 3H), 2.00–1.85 (m, 2H). <sup>13</sup>C-NMR (75 MHz, CDCl<sub>3</sub>): δ = 143.3, 138.2, 135.5, 130.4, 129.3, 128.0, 126.5, 125.5, 36.7, 33.6, 23.8, 21.1. IR (KBr): 2949, 2843, 1487, 1457, 1035, 749, 721 cm<sup>-1</sup>. MS (EI) *m/z* (relative intensity) 158 ([M<sup>+</sup>] 68), 143 (100), 128 (36), 115 (21). HR-MS (EI) *m/z* calcd for C<sub>12</sub>H<sub>14</sub> 158.1096, found 158.1079.

**Representative procedure for palladium-catalyzed cross-coupling reactions of aryl chlorides with boronic acids (Table 2, entry 14):**

A solution of [Pd(dba)<sub>2</sub>] (12 mg, 0.02 mmol, 2 mol%) and **8** (21 mg, 0.04 mmol, 4 mol%), 4-chlorobenzophenone (**1f**) (0.217 g, 1.00 mmol), phenylboronic acid (0.182 g, 1.50 mmol) and KOtBu (0.377 g, 3.00 mmol) in dry THF (5 mL) was stirred for 24 h at 60 °C. Et<sub>2</sub>O (50 mL) and sat. NaHCO<sub>3</sub> (50 mL) were added to the reaction mixture. The separated aqueous phase was extracted with Et<sub>2</sub>O (2 × 50 mL). The combined organic layers were dried over MgSO<sub>4</sub> and concentrated in vacuo. The remaining residue was purified by column chromatography on silica gel (*n*-pentane/Et<sub>2</sub>O = 200/1→100/1→50/1→30/1) to yield **3f**

(0.192 g, 74 %) as a colourless solid (MP: 101.0–101.2 °C). The spectral data were in accordance with those reported in the literature.<sup>[4]</sup>

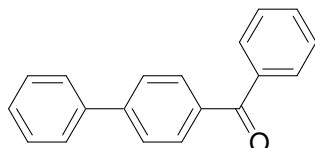

<sup>1</sup>H-NMR (300 MHz, CDCl<sub>3</sub>):  $\delta$  = 7.91 (md,  $J$  = 8.6 Hz, 2H), 7.85 (md,  $J$  = 8.3 Hz, 2H), 7.72 (md,  $J$  = 8.6 Hz, 2H), 7.66 (md,  $J$  = 8.2 Hz, 2H), 7.62–7.58 (m, 1H), 7.54–7.46 (m, 4H), 7.44–7.39 (m, 1H). <sup>13</sup>C-NMR (75 MHz, CDCl<sub>3</sub>):  $\delta$  = 196.3, 145.2, 140.0, 137.7, 136.2, 132.3, 130.7, 129.9, 128.9, 128.3, 128.1, 127.3, 126.9. IR (neat, cm<sup>-1</sup>): 3051, 1642, 1601, 1315, 1286, 1272, 938, 850, 729, 693. MS (EI)  $m/z$  (relative intensity) 259(12), 258 ([M<sup>+</sup>] 66), 257 (6), 182 (13), 181 (100), 153 (17), 152 (30), 151 (7), 115 (7), 105 (16), 77 (14). HR-MS (EI)  $m/z$  calcd for C<sub>19</sub>H<sub>14</sub>O 258.1045, found 258.1056.

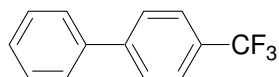

**1-Phenyl-4-(trifluoromethyl)benzene (3c) (Table 2, entry 15):**

The representative procedure was followed, using 4-chloro-(trifluoromethyl)benzene (**1c**) (0.181 g, 1.00 mmol) and phenylboronic acid (0.182 g, 1.50 mmol). After 24 h, purification by chromatography (*n*-pentane/Et<sub>2</sub>O = 50/1) yielded

**3c** (0.204 g, 92 %) as a colourless solid. The spectral data were in accordance with those reported in the literature.<sup>[1]</sup>

<sup>1</sup>H-NMR (300 MHz, CDCl<sub>3</sub>):  $\delta$  = 7.71–7.70 (m, 4H), 7.63–7.59 (m, 2H), 7.52–7.41 (m, 3H). <sup>13</sup>C-NMR (75 MHz, CDCl<sub>3</sub>):  $\delta$  = 144.7, 139.8, 129.0, 128.9, 128.2, 127.4, 127.3, 125.7, 124.3. <sup>19</sup>F-NMR (375 MHz, CDCl<sub>3</sub>):  $\delta$  = -60.7 (s). IR (KBr): 3083, 3037, 2929, 2854, 1326, 1111, 1072, 1014, 1005, 842, 765, 726 cm<sup>-1</sup>. MS (EI) *m/z* (relative intensity) 222 ([M<sup>+</sup>] 100), 221 (2), 203 (6), 201 (6), 172 (2), 153 (9), 152 (11), 151 (3), 111 (2), 86 (3), 76 (2). HR-MS (EI) *m/z* calcd for C<sub>13</sub>H<sub>9</sub>F<sub>3</sub> 222.0656, found 222.0670.

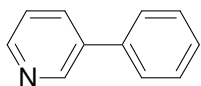

**3-Phenylpyridine (3a) (Table 2, entry 16):** The representative procedure was followed, using 3-chloropyridine (**1a**) (0.113 g, 1.00 mmol) and phenylboronic acid (0.182 g, 1.50 mmol). After 24 h, purification by chromatography (*n*-pentane/Et<sub>2</sub>O = 10/1→5/1→2/1) yielded **3a** (0.151 g, 95 %) as a yellow liquid. The spectral data were in accordance with those reported in the literature.<sup>[2]</sup>

<sup>1</sup>H-NMR (300 MHz, CDCl<sub>3</sub>):  $\delta$  = 8.85 (dd, *J* = 2.3, 0.8 Hz, 1H), 8.58 (dd, *J* = 4.9, 1.7 Hz, 1H), 7.86 (ddd, *J* = 7.8, 2.3, 1.7 Hz, 1H), 7.59–7.55 (m, 2H), 7.51–7.32 (m, 4H). <sup>13</sup>C-NMR (75 MHz, CDCl<sub>3</sub>):  $\delta$  = 148.4, 148.2, 137.8, 136.6, 134.3, 129.0, 128.0, 127.1, 123.5. IR (KBr): 3400, 3055, 1528, 1473, 1450,

1407, 1277, 1076, 1024, 1006, 913  $\text{cm}^{-1}$ . MS (EI)  $m/z$  (relative intensity) 155 ( $[\text{M}^+]$  100), 127 (7), 102 (5), 77 (3). HR-MS (EI)  $m/z$  calcd for  $\text{C}_{11}\text{H}_9\text{N}$  155.0735, found 155.0739.

#### References:

- [1] J.-H. Li and W.-J. Liu, *Org. Lett.*, 2004, **16**, 2809–2812.
- [2] C. Wolf and R. Lerebours, *Org. Lett.*, 2004, **6**, 1147–1150.
- [3] S. Crosignani, J. Gonzalez and D. Swinnen, *Org. Lett.*, 2004, **6**, 4579–4582.
- [4] L. R. Moore and K. H. Shaughnessy, *Org. Lett.*, 2004, **6**, 225.
- [5] M. Feuerstein, H. Doucet and M. Santelli, *J. Organomet. Chem. Soc.*, 2003, **687**, 327.
- [6] Z.-Y. Tang and Q.-S. Hu, *J. Am. Chem. Soc.*, 2004, **126**, 3058.
- [7] V. Percec, G. M. Golding, J. Smidrkal, O. Weichold, *J. Org. Chem.*, 2004, **69**, 3447–3452.
- [8] C. Song, Y. Ma, Q. Chai, C. Ma, W. Jiang, M. B. Andrus, *Tetrahedron*, 2005, **61**, 7438–7446.
- [9] C. Dai and G. C. Fu, *J. Am. Chem. Soc.*, 2001, **123**, 2719–2724.
